# Supplementary material for: Effect of Probiotic Lactobacillus plantarum on Streptococcus mutans and Candida albicans Clinical Isolates from Children with Early Childhood Caries
Source: MDPI journal article supplement (doi:10.3390/ijms24032991), 2023-02-03
Supplement: s1 [file s1]

# Title:

Effect of probiotic *Lactobacillus plantarum* on *Streptococcus mutans* and *Candida albicans* clinical isolates from children with early childhood caries

## Supplementals

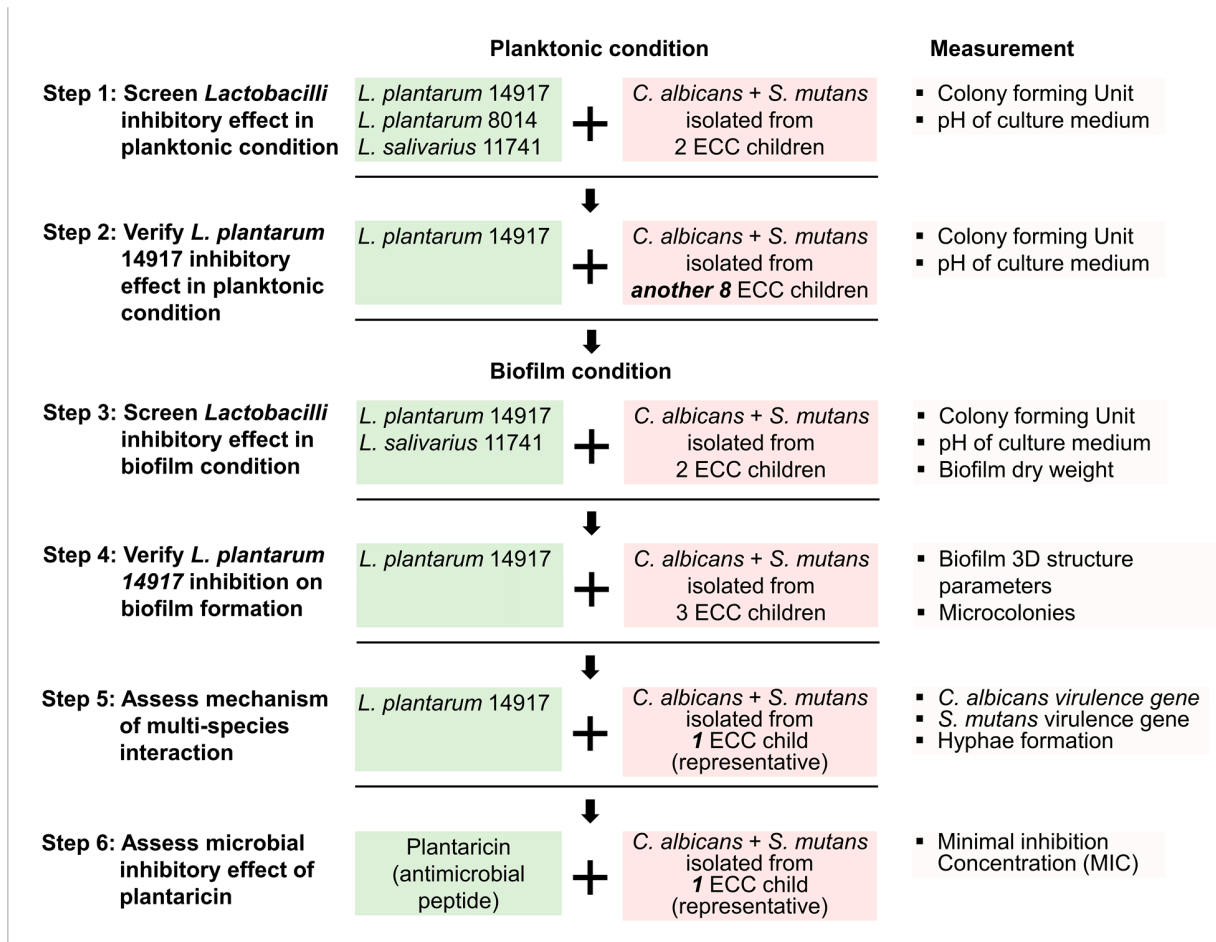

Figure S1. Study design

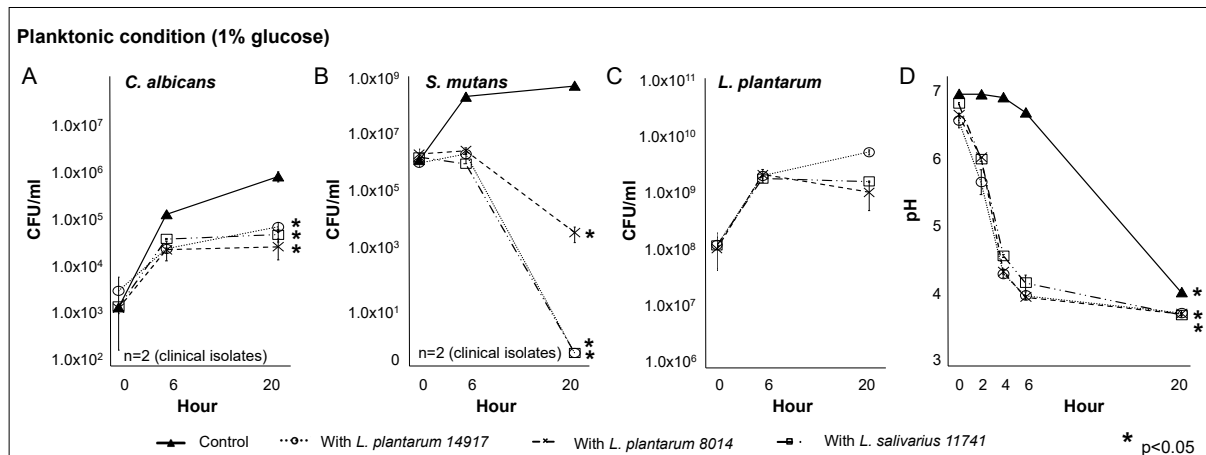

**Figure S2. Inhibitory effect of *Lactobacillus* species on clinically isolated *C. albicans* and *S. mutans* from children with early childhood caries in multispecies planktonic condition.**

The growth of *C. albicans*, *S. mutans*, and *Lactobacillus* spp. in multispecies planktonic condition are plotted. *C. albicans* and *S. mutans* clinical strains were isolated from two children with early childhood caries (ECC). Experiments repeated in triplicates. Each planktonic multispecies condition included the *C. albicans* and *S. mutans* isolated from the same ECC child, with added *L. plantarum* 14917. The control group only consisted of *C. albicans* and *S. mutans*. The treated group included *Lactobacilli* was marked as “with *Lactobacillus* spp.”. (A) All three *Lactobacillus* inhibited the growth of *C. albicans* by <1 log after 6 hours and 1-2 logs following 20 hours’ incubation. (B) All three *Lactobacillus* inhibited the growth of *S. mutans*. The performance is ranked by *L. plantarum* 14917 and *L. salivarius* 11741, and *L. plantarum* 8014. All three *Lactobacilli* significantly inhibited the growth of *S. mutans* at 6 hours by 2 logs. *L. plantarum* 14917 and *L. salivarius* 11741 completely inhibited the growth of *S. mutans* after 20 hours, with the exception of *L. plantarum* 8014. (C) *Lactobacilli* maintained a stable growth during the 20 hours’ interaction with *S. mutans* and *C. albicans*. (D) The culture medium pH dropped rapidly with the addition of *Lactobacilli* in planktonic condition, both control and treated groups reached the same acidic level at 20 hours.

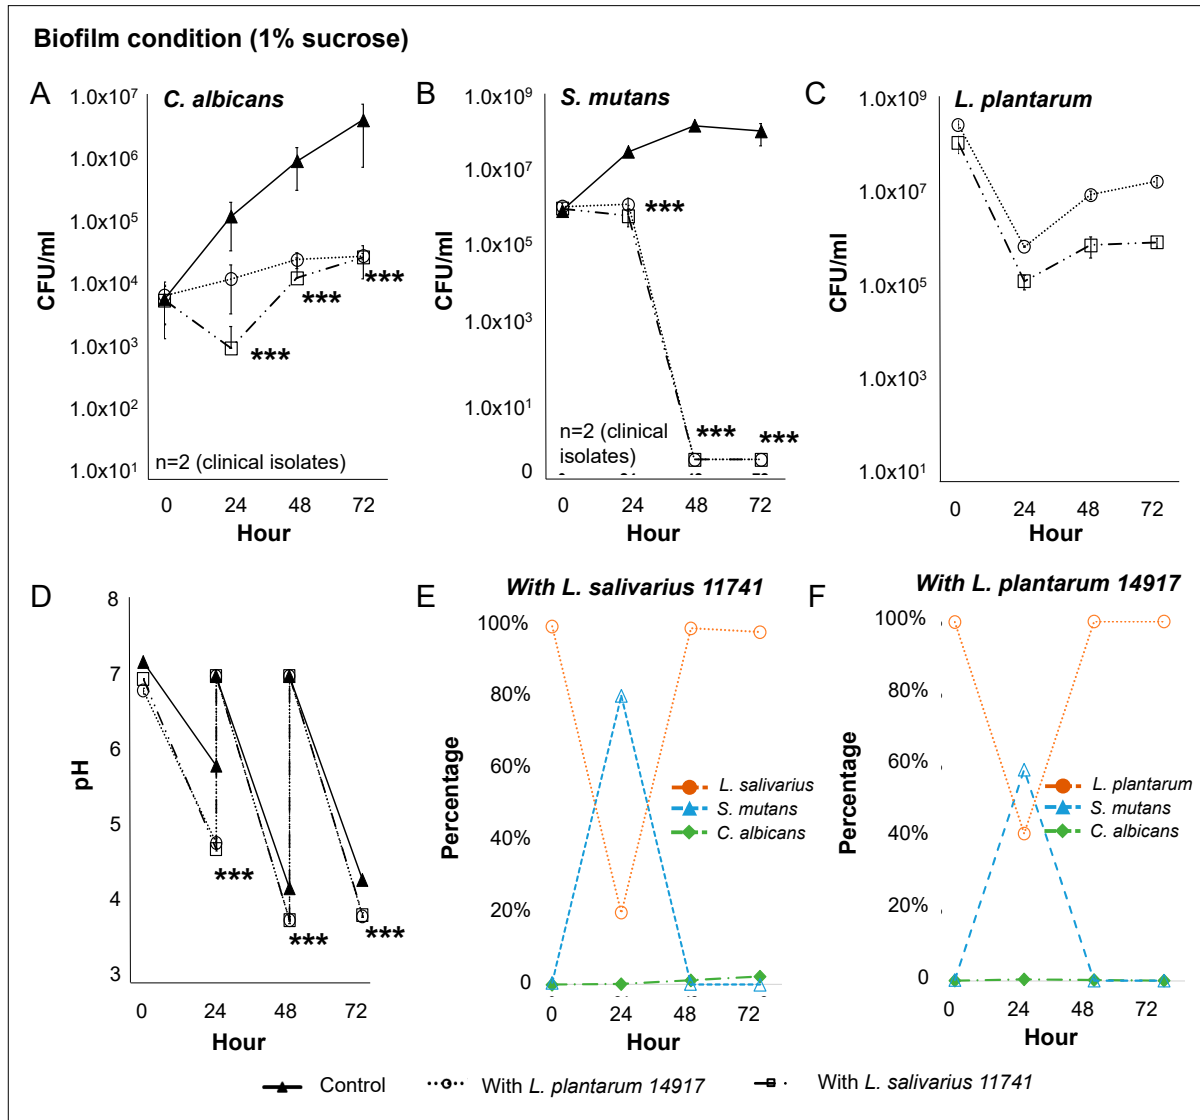

**Figure S3. Inhibition of *C. albicans* and *S. mutans* in ECC children by *Lactobacilli* in multispecies biofilms.**

Multispecies biofilms were formed by *L. plantarum* 14917 and *L. salivarius* 11741 and clinically isolated *C. albicans*, *S. mutans* from two children with ECC. The control group consists of *C. albicans* and *S. mutans* from the same ECC child. (A) *L. plantarum* and *L. salivarius* inhibited the growth of *C. albicans* by 3 logs compared to the control group. (B) At 48 hours, after two times administration of *L. plantarum* and *L. salivarius*, *S. mutans* was completely inhibited in biofilms of treatment group. (C) *Lactobacilli* maintained stable growth during 72-h incubation period with *L. plantarum* being significantly higher than *L. salivarius*. (D) The pH of the culture medium was significantly lower with added *Lactobacilli* at 24, 48 and 72 hours, comparing to the control group ( $p < 0.05$ ). (E-F) The composition of each microorganism is plotted. *Lactobacilli* became the dominate species after 48 h incubation.

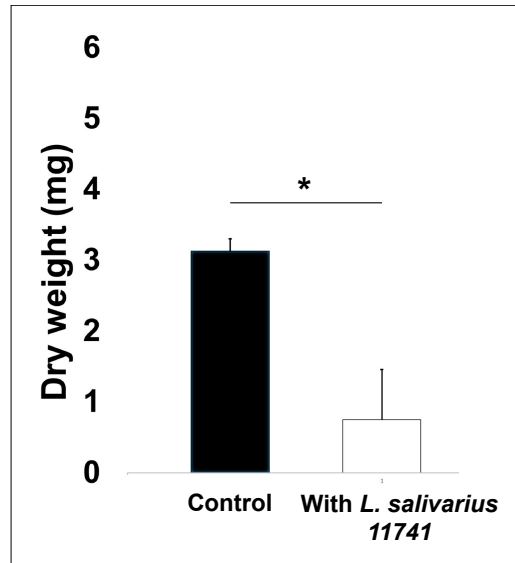

**Figure S4. Dry weight of biofilms treated by *L. salivarius***

Multispecies biofilms were formed by *L. salivarius* 11741 and clinically isolated *C. albicans*, *S. mutans* from two children with ECC. The control group consists of *C. albicans* and *S. mutans* from the same ECC child. Biofilm formation was reduced with *Lactobacilli*, almost 70% reduction with *L. salivarius* in term of measurement by the dry-weight at 72 hours.

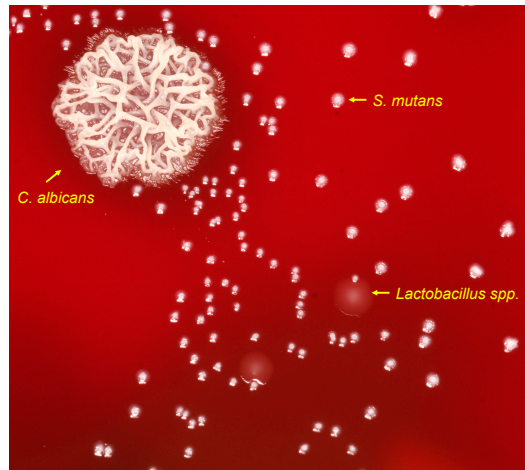

**Figure S5. Distinct morphological differences between *S. mutans*, *C. albicans*, and *Lactobacillus* spp.**
